# Supplementary material for: 2-Imino-2,3-dihydrobenzoxazole—a useful platform for designing rare- and alkaline earth complexes with variable di- and trianionic O,N,N, ligands
Source: Royal Society of Chemistry journal article supplement (doi:10.1039/d1dt04139h), 2021-12-28
Supplement: d1dt04139h1.pdf [file d1dt04139h1.pdf]

## Electronic Supplementary Information

# 2-Imino-2,3-dihydrobenzoxazole – a Useful Platform for Designing Rare- and Alkaline Earth Complexes with Variable Di- and Trianionic O,N,N, Ligands

Ivan V. Basalov,<sup>a</sup> Alexander A. Kissel,<sup>b</sup> Elena N. Nikolaevskaya,<sup>c</sup> Nikolai O. Druzhkov,<sup>a</sup> Anton V.

Cherkasov,<sup>a</sup> Jérôme Long,<sup>d</sup> Joulia Larionova,<sup>d</sup> Georgy K.Fukin,<sup>a</sup> Alexander A. Trifonov<sup>a,b,\*</sup>

<sup>a</sup>*G. A. Razuvaev Institute of Organometallic Chemistry of Russian Academy of Sciences, 603137, 49 Tropinina str., Nizhny Novgorod, Russia GSP-445, Fax: + 007-831-462-74-97 E-mail: trif@iomc.ras.ru.*

<sup>b</sup>*A. N. Nesmeyanov Institute of Organoelement Compounds of Russian Academy of Sciences, 28 Vavilova str., 119991, Moscow, GSP-1, Russia*

<sup>c</sup>*N. D. Zelinsky Institute of Organic Chemistry of Russian Academy of Sciences, 47 Leninsky Av., 119991, Moscow, GSP-1, Russia.*

<sup>d</sup>*Institut Charles Gerhardt, Equipe Ingénierie Moléculaire et Nano-Objets, Université de Montpellier, ENSCM, CNRS. Place Eugène Bataillon, 34095 Montpellier Cedex 5, France*

## Table of contents

|                                                                                                                     |          |
|---------------------------------------------------------------------------------------------------------------------|----------|
| <b>Table S1.</b> Crystal Data and Structure Refinement for Complexes <b>1, 2, 3, 5</b> .....                        | <b>3</b> |
| <b>Figure S1.</b> $^1\text{H}$ NMR spectrum (400 MHz, $\text{C}_6\text{D}_6$ ) of <b>2</b> . .....                  | <b>4</b> |
| <b>Figure S2.</b> $^{13}\text{C}\{^1\text{H}\}$ NMR spectrum (101 MHz, $\text{C}_6\text{D}_6$ ) of <b>2</b> . ..... | <b>4</b> |
| <b>Figure S3.</b> $^1\text{H}$ NMR spectrum (400 MHz, $\text{C}_6\text{D}_6$ ) of <b>3</b> . .....                  | <b>5</b> |
| <b>Figure S4.</b> $^{13}\text{C}\{^1\text{H}\}$ NMR spectrum (101 MHz, $\text{C}_6\text{D}_6$ ) of <b>3</b> . ..... | <b>5</b> |
| <b>Figure S5.</b> $^1\text{H}$ NMR spectrum (400 MHz, $\text{C}_6\text{D}_6$ ) of <b>4</b> . .....                  | <b>6</b> |
| <b>Figure S6.</b> $^{13}\text{C}\{^1\text{H}\}$ NMR spectrum (101 MHz, $\text{C}_6\text{D}_6$ ) of <b>4</b> . ..... | <b>6</b> |
| <b>Figure S7.</b> $^1\text{H}$ NMR spectrum (400 MHz, $\text{C}_6\text{D}_6$ ) of <b>5</b> . .....                  | <b>7</b> |
| <b>Figure S8.</b> $^{13}\text{C}\{^1\text{H}\}$ NMR spectrum (101 MHz, $\text{C}_6\text{D}_6$ ) of <b>5</b> . ..... | <b>7</b> |

**Table S1.** Crystal data and structure refinement details for complexes **1-3, 5**.

|                                                    | <b>1</b>                                                                                                                | <b>2</b>                                                                                                         | <b>3</b>                                                                                                             | <b>5</b>                                                                                                                                     |
|----------------------------------------------------|-------------------------------------------------------------------------------------------------------------------------|------------------------------------------------------------------------------------------------------------------|----------------------------------------------------------------------------------------------------------------------|----------------------------------------------------------------------------------------------------------------------------------------------|
| Empirical formula                                  | C <sub>40</sub> H <sub>71</sub> N <sub>3</sub> O <sub>3</sub> Si <sub>2</sub> Yb,<br>1/2C <sub>4</sub> H <sub>8</sub> O | C <sub>68</sub> H <sub>100</sub> Ca <sub>2</sub> N <sub>4</sub> O <sub>4</sub> , C <sub>4</sub> H <sub>8</sub> O | C <sub>76</sub> H <sub>116</sub> CaN <sub>4</sub> Na <sub>2</sub> O <sub>6</sub> ,<br>C <sub>6</sub> H <sub>14</sub> | C <sub>42</sub> H <sub>73</sub> N <sub>2</sub> O <sub>5</sub> SiY,<br>1/2C <sub>6</sub> H <sub>14</sub> , 1/2C <sub>4</sub> H <sub>8</sub> O |
| Formula weight                                     | 979.37                                                                                                                  | 1189.78                                                                                                          | 1353.95                                                                                                              | 882.16                                                                                                                                       |
| Crystal system                                     | Monoclinic                                                                                                              | Monoclinic                                                                                                       | Monoclinic                                                                                                           | Monoclinic                                                                                                                                   |
| Space group                                        | <i>P2<sub>1</sub>/n</i>                                                                                                 | <i>C2</i>                                                                                                        | <i>C2/c</i>                                                                                                          | <i>P2<sub>1</sub>/c</i>                                                                                                                      |
| Unit cell dimensions                               | a = 15.1288(18)Å b = 15.8035(18)Å c = 22.479(3)Å<br>α = 90°<br>β = 101.070(2)°<br>γ = 90°                               | a = 19.1393(14)Å b = 17.1302(13)Å c = 13.5419(10)Å<br>α = 90°<br>β = 130.5560(10)°<br>γ = 90°                    | a = 23.3970(13)Å b = 17.8742(10)Å c = 20.0635(11)Å<br>α = 90°<br>β = 110.4960(10)°<br>γ = 90°                        | a = 14.7864(2)Å b = 18.1974(2)Å c = 18.7593(3)Å<br>α = 90°<br>β = 98.6680(14)°<br>γ = 90°                                                    |
| <i>V</i> , Å <sup>3</sup>                          | 5274.5(11)                                                                                                              | 3373.3(4)                                                                                                        | 7859.5(8)                                                                                                            | 4989.99(12)                                                                                                                                  |
| <i>Z</i>                                           | 4                                                                                                                       | 2                                                                                                                | 4                                                                                                                    | 4                                                                                                                                            |
| <i>d</i> <sub>calc</sub> , g/cm <sup>3</sup>       | 1.233                                                                                                                   | 1.171                                                                                                            | 1.144                                                                                                                | 1.174                                                                                                                                        |
| μ, mm <sup>-1</sup>                                | 1.858                                                                                                                   | 0.220                                                                                                            | 0.143                                                                                                                | 1.236                                                                                                                                        |
| <i>F</i> <sub>000</sub>                            | 2056                                                                                                                    | 1296                                                                                                             | 2960                                                                                                                 | 1908                                                                                                                                         |
| Crystal dimensions, mm                             | 0.25×0.20×0.05                                                                                                          | 0.28×0.20×0.10                                                                                                   | 0.41×0.30×0.19                                                                                                       | 0.30×0.20×0.20                                                                                                                               |
| θ range for data collection, °                     | 1.88-27.19                                                                                                              | 2.80-29.90                                                                                                       | 2.52-28.82                                                                                                           | 2.94-30.03                                                                                                                                   |
| <i>hkl</i> indices                                 | -19<=h<=19<br>-20<=k<=19<br>-23<=l<=28                                                                                  | -26<=h<=26<br>-23<=k<=23<br>-18<=l<=18                                                                           | -31<=h<=31<br>-24<=k<=24<br>-26<=l<=27                                                                               | -20<=h<=20<br>-25<=k<=25<br>-26<=l<=26                                                                                                       |
| Reflns collected                                   | 36244                                                                                                                   | 20310                                                                                                            | 50191                                                                                                                | 103537                                                                                                                                       |
| Independent reflns ( <i>R</i> <sub>int</sub> )     | 11681 (0.0686)                                                                                                          | 9632 (0.0290)                                                                                                    | 10182 (0.0322)                                                                                                       | 14579 (0.0934)                                                                                                                               |
| Completeness to θ, %                               | 99.4                                                                                                                    | 99.7                                                                                                             | 99.8                                                                                                                 | 99.9                                                                                                                                         |
| Data / restraints / parameters                     | 11681 / 180 / 571                                                                                                       | 9632 / 207 / 537                                                                                                 | 10182 / 63 / 488                                                                                                     | 14579 / 235 / 618                                                                                                                            |
| <i>S</i> ( <i>F</i> <sup>2</sup> )                 | 1.000                                                                                                                   | 1.060                                                                                                            | 1.011                                                                                                                | 1.034                                                                                                                                        |
| Final <i>R</i> indices ( <i>I</i> >2σ( <i>I</i> )) | <i>R</i> <sub>1</sub> = 0.0480<br>w <i>R</i> <sub>2</sub> = 0.1068                                                      | <i>R</i> <sub>1</sub> = 0.0639<br>w <i>R</i> <sub>2</sub> = 0.1601                                               | <i>R</i> <sub>1</sub> = 0.0473<br>w <i>R</i> <sub>2</sub> = 0.1216                                                   | <i>R</i> <sub>1</sub> = 0.0556<br>w <i>R</i> <sub>2</sub> = 0.1118                                                                           |
| <i>R</i> indices (all data)                        | <i>R</i> <sub>1</sub> = 0.0923<br>w <i>R</i> <sub>2</sub> = 0.1263                                                      | <i>R</i> <sub>1</sub> = 0.0711<br>w <i>R</i> <sub>2</sub> = 0.1652                                               | <i>R</i> <sub>1</sub> = 0.0602<br>w <i>R</i> <sub>2</sub> = 0.1312                                                   | <i>R</i> <sub>1</sub> = 0.0881<br>w <i>R</i> <sub>2</sub> = 0.1240                                                                           |
| <i>Flack</i> parameter                             |                                                                                                                         | 0.08(5)                                                                                                          |                                                                                                                      |                                                                                                                                              |
| Largest diff peak and hole, e/Å <sup>3</sup>       | 2.16 / -0.97                                                                                                            | 0.62 / -0.50                                                                                                     | 0.54 / -0.23                                                                                                         | 1.01 / -0.60                                                                                                                                 |

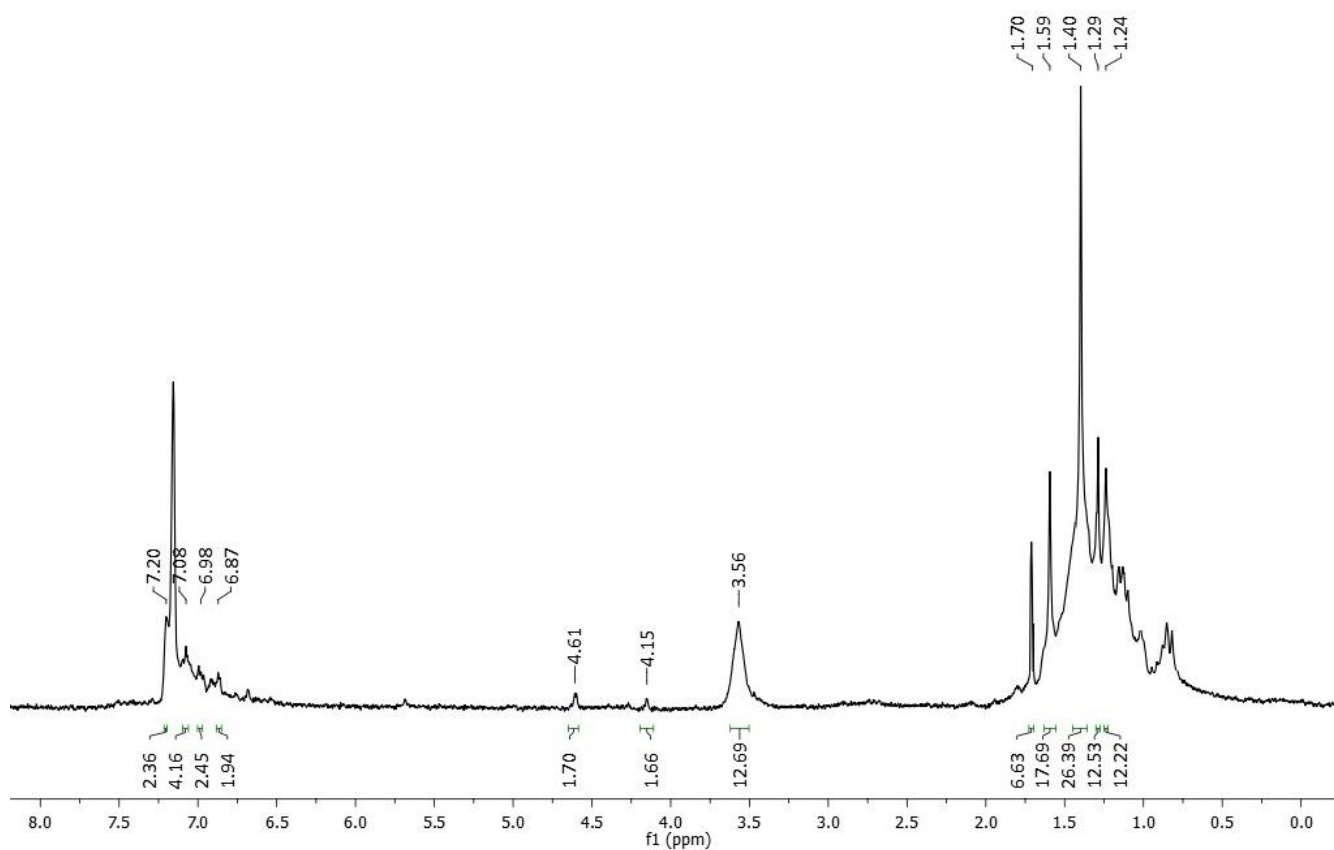

Figure S1.  $^1\text{H}$  NMR spectrum (400 MHz,  $\text{C}_6\text{D}_6$ ) of **2**.

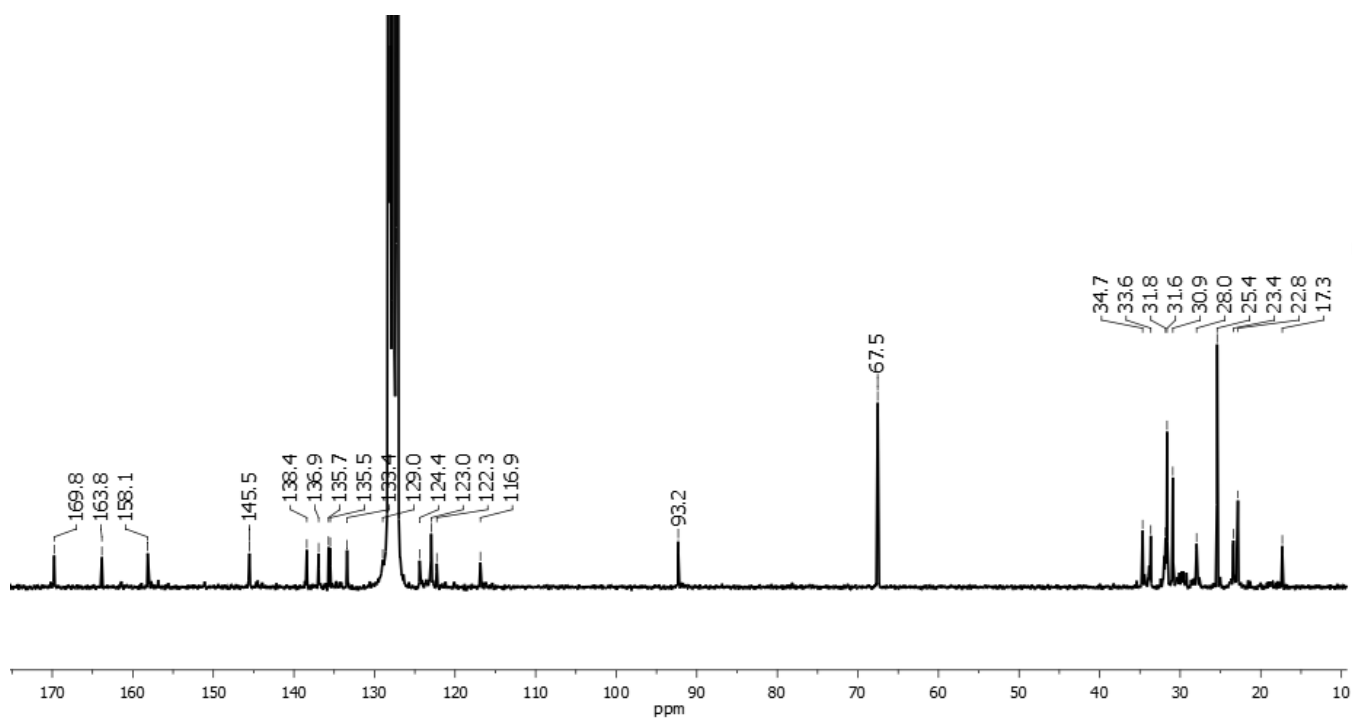

Figure S2.  $^{13}\text{C}\{^1\text{H}\}$  NMR spectrum (101 MHz,  $\text{C}_6\text{D}_6$ ) of **2**.

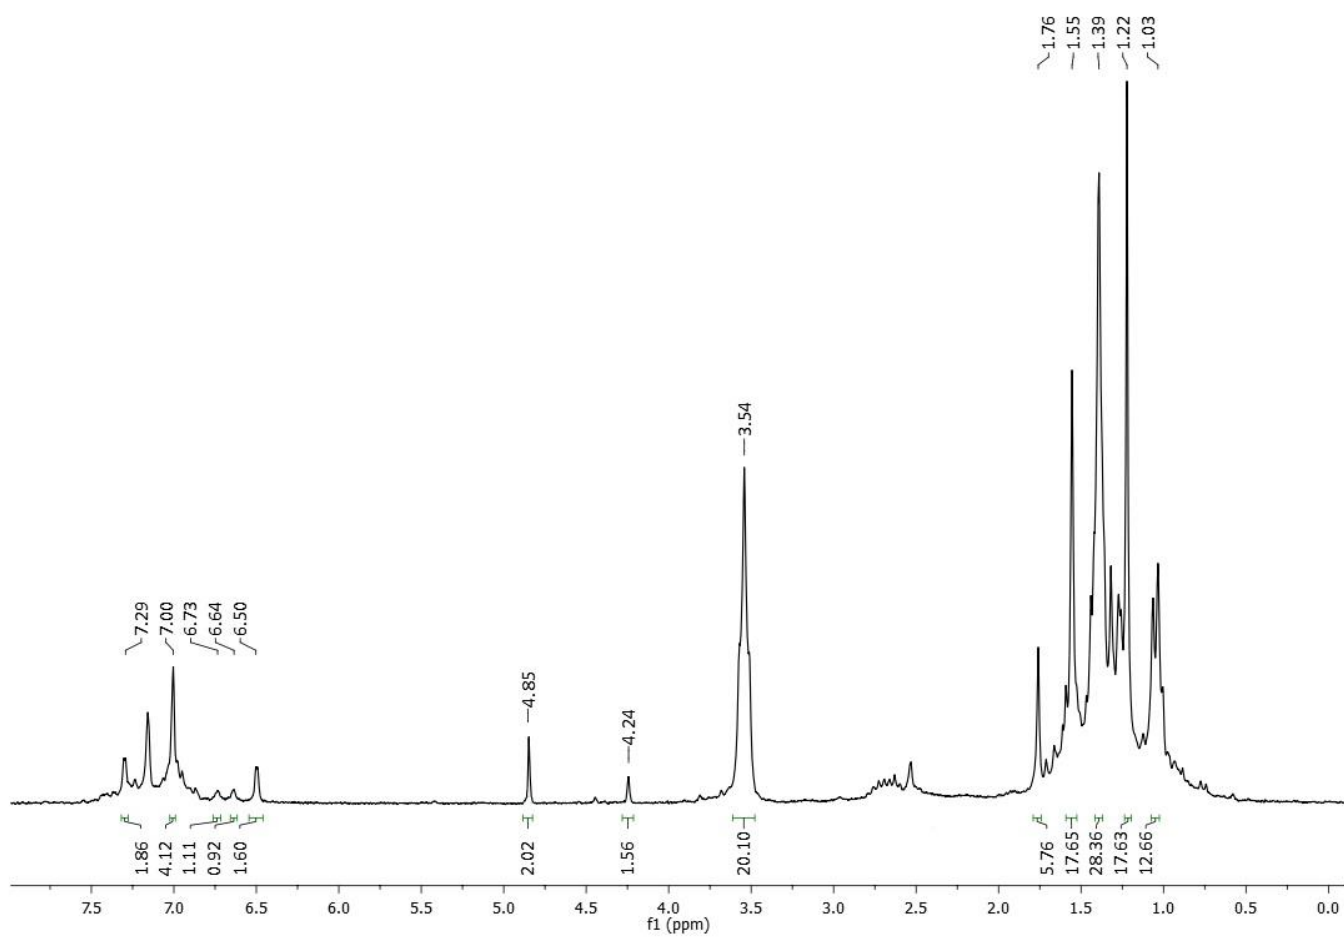

Figure S3.  $^1\text{H}$  NMR spectrum (400 MHz,  $\text{C}_6\text{D}_6$ ) of **3**.

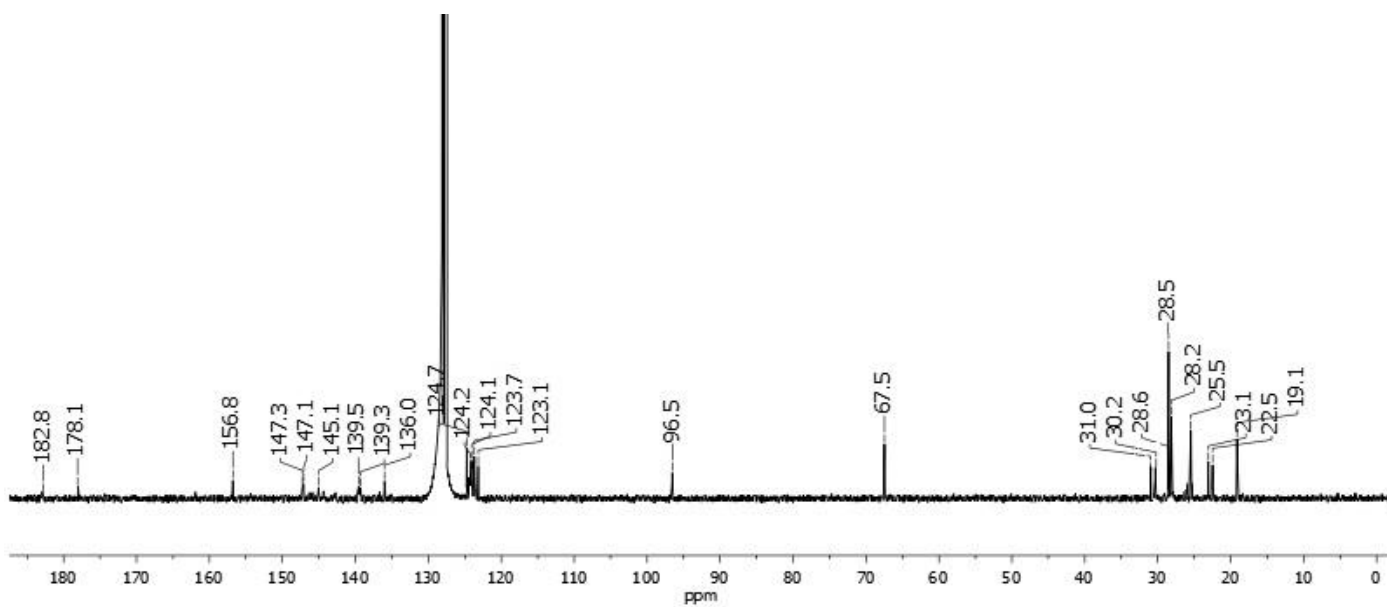

Figure S4.  $^{13}\text{C}\{^1\text{H}\}$  NMR spectrum (101 MHz,  $\text{C}_6\text{D}_6$ ) of **3**.

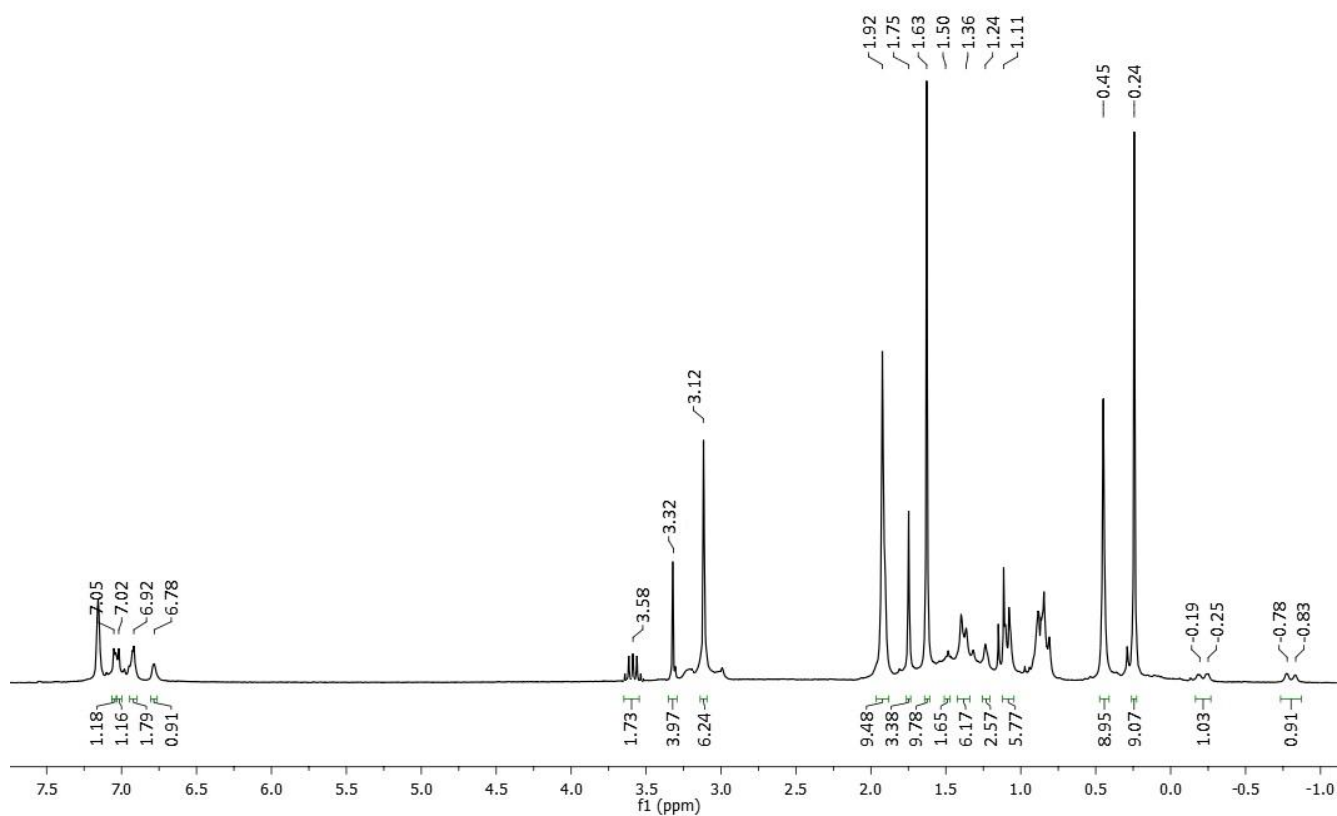

**Figure S5.**  $^1\text{H}$  NMR spectrum (400 MHz,  $\text{C}_6\text{D}_6$ ) of **4**.

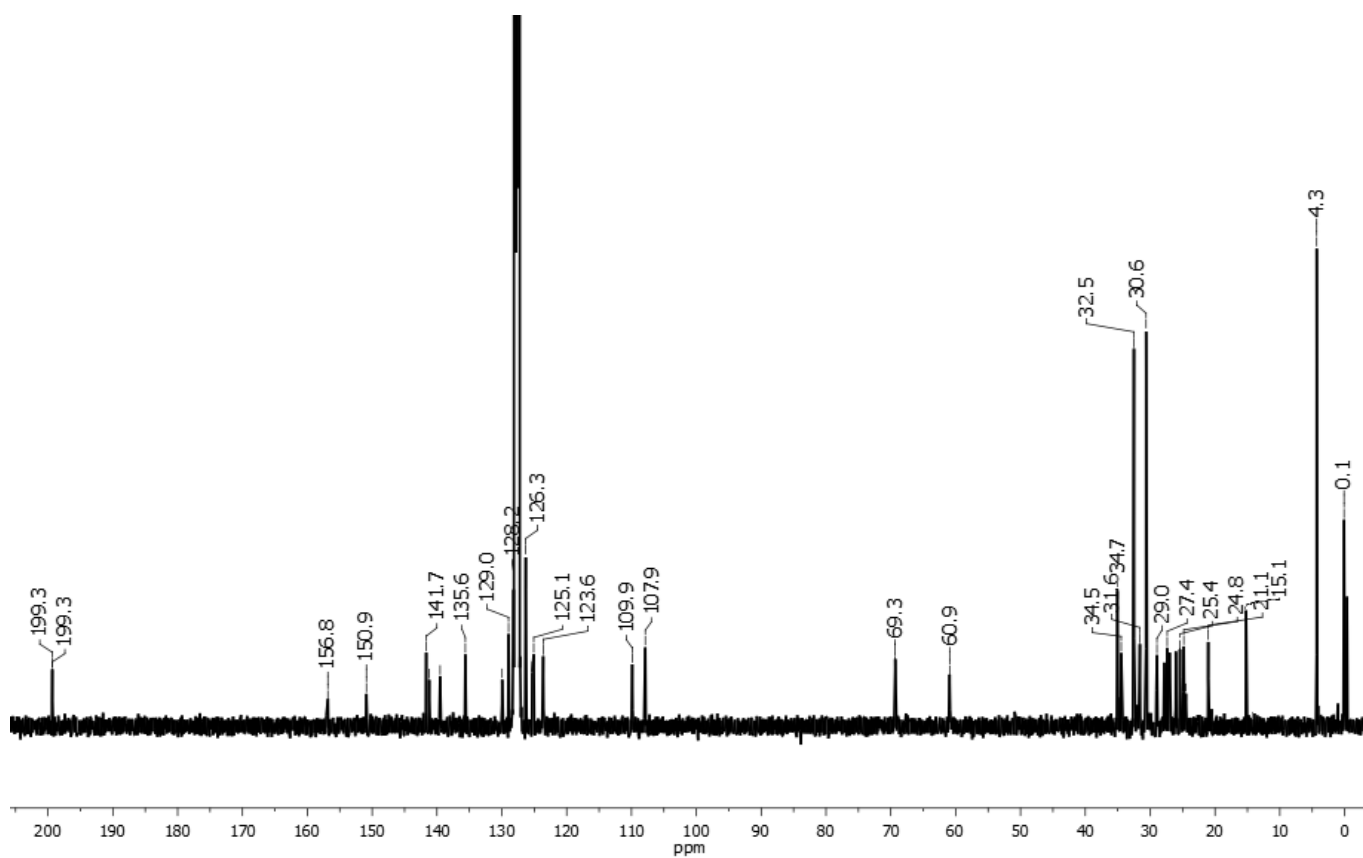

**Figure S6.**  $^{13}\text{C}\{^1\text{H}\}$  NMR spectrum (101 MHz,  $\text{C}_6\text{D}_6$ ) of **4**.

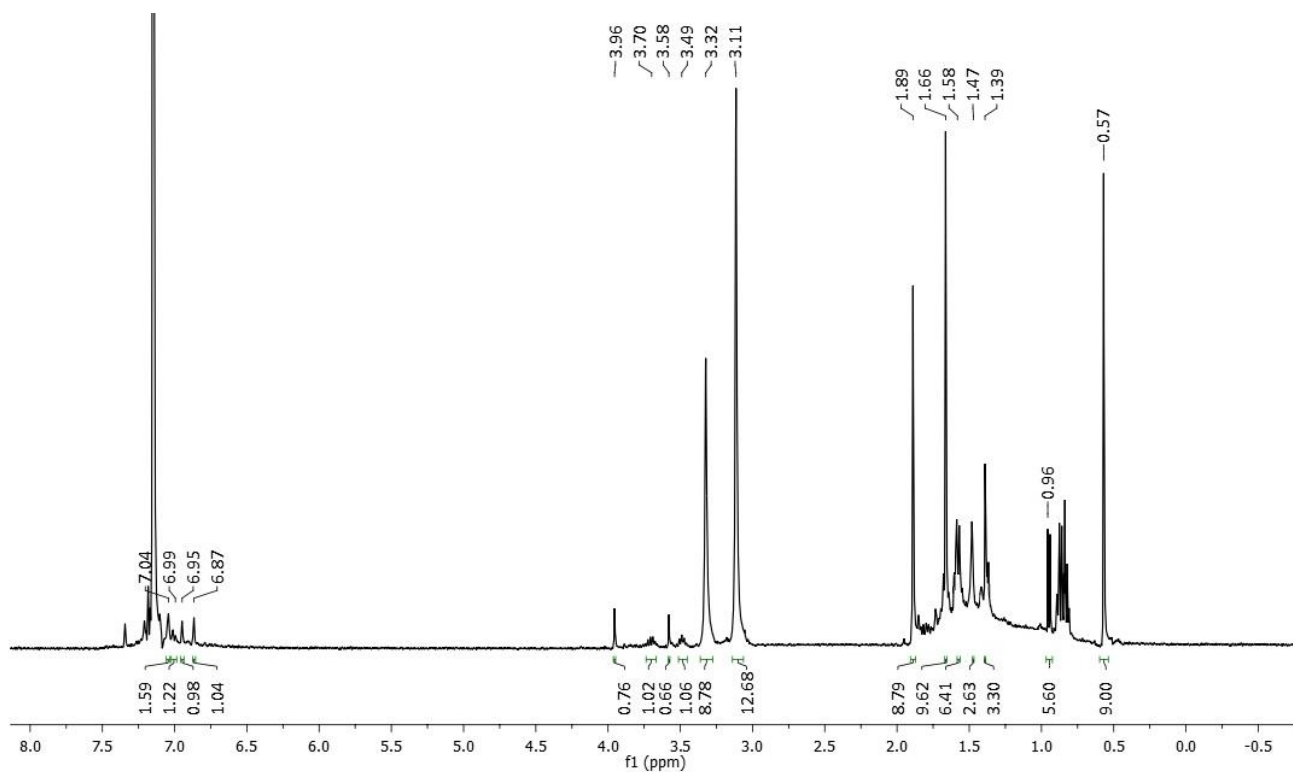

Figure S7.  $^1\text{H}$  NMR spectrum (400 MHz,  $\text{C}_6\text{D}_6$ ) of **5**.

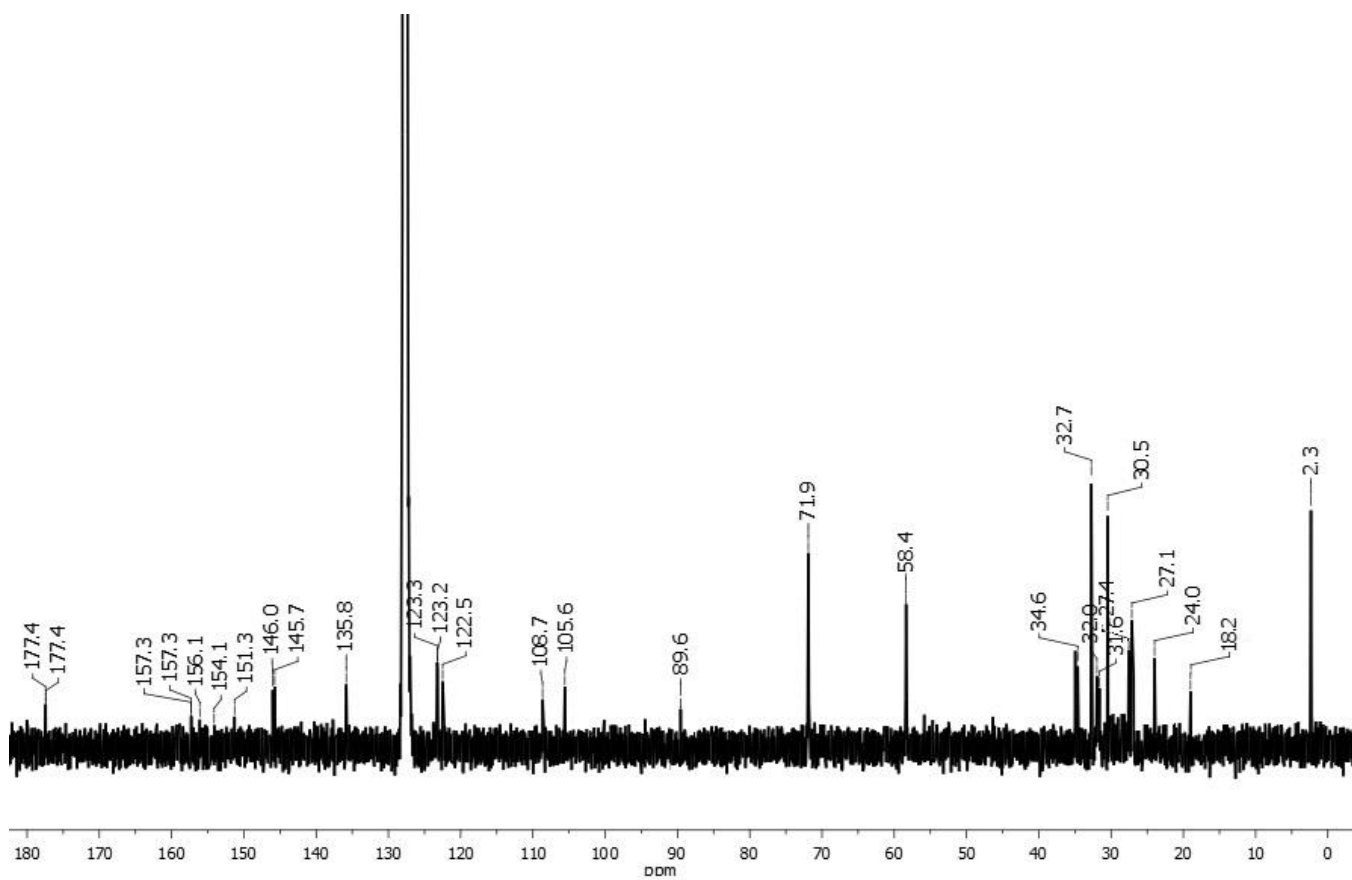

Figure S8.  $^{13}\text{C}\{^1\text{H}\}$  NMR spectrum (101 MHz,  $\text{C}_6\text{D}_6$ ) of **5**.
